# Supplementary material
Source: HighWire-hosted journal article supplement (https://www.cmaj.ca/highwire/filestream/71755/field_highwire_adjunct_files/0/180759-image-1-at.pdf)
Supplement: 180759-image-1-at.pdf [file 180759-image-1-at.pdf]

Appendix 1

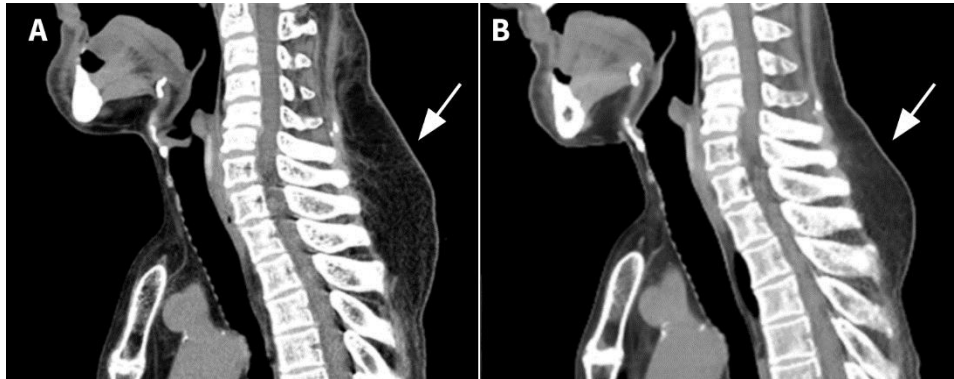

Computed tomography scans of a patient with Madelung disease (sagittal view). The arrows show the size of the fat mass at A) the patient's initial visit and B) reduced 6 months after moderation of alcohol intake.
